# Supplementary material for: GP73 is a TBC-domain Rab GTPase-activating protein contributing to the pathogenesis of non-alcoholic fatty liver disease without obesity
Source: PubMed Central journal article supplement (PMC8636488; doi:10.1038/s41467-021-27309-1), 2021-12-01
Supplement: 41467_2021_27309_MOESM1_ESM.pdf [file 41467_2021_27309_MOESM1_ESM.pdf]

1 **Supplementary Information**

2 **GP73 is a TBC-domain Rab GTPase-activating protein contributing to**  
3 **the pathogenesis of non-alcoholic fatty liver disease without obesity**

4 Yumeng Peng<sup>1,2,8</sup>, Qiang Zeng<sup>3,8</sup>, Luming Wan<sup>1,8</sup>, Enhao Ma<sup>4,8</sup>, Huilong Li<sup>1,2,8</sup>, Xiaopan Yang<sup>1,8</sup>,  
5 Yanhong Zhang<sup>1</sup>, Linfei Huang<sup>1</sup>, Haotian Lin<sup>1</sup>, Jiangyue Feng<sup>1</sup>, Yixin Xu<sup>1,2</sup>, Jingfei Li<sup>1</sup>, Muyi Liu<sup>1</sup>, Jing  
6 Liu<sup>1</sup>, Changqin Lin<sup>5</sup>, Zhiwei Sun<sup>5</sup>, Gong Cheng<sup>4</sup>, Xuemiao Zhang<sup>1,6</sup>, Jialong Liu<sup>1,6</sup>, Dongrui Li<sup>1</sup>, Meng  
7 Wei<sup>1,2</sup>, Yunhai Mo<sup>1,2</sup>, Xuetao Mu<sup>6</sup>, Xiaowei Deng<sup>6</sup>, Dandan Zhang<sup>6</sup>, Siqing Dong<sup>6</sup>, Hanqing Huang<sup>1</sup>,  
8 Yi Fang<sup>7\*</sup>, Qi Gao<sup>5\*</sup>, Xiaoli Yang<sup>6\*</sup>, Feixiang Wu<sup>2\*</sup>, Hui Zhong<sup>1\*</sup>, and Congwen Wei<sup>1\*</sup>

9 <sup>1</sup> Beijing Institute of Biotechnology, Academy of Military Medical Sciences (AMMS),  
10 Beijing, China.

11 <sup>2</sup> Department of Hepatobiliary Surgery, Affiliated Tumor Hospital of Guangxi Medical  
12 University, Nanning, China.

13 <sup>3</sup> Health management Institute, The Second Medical Center and National Clinical  
14 Research Center for Geriatric Diseases, Chinese PLA General Hospital, Beijing, China.

15 <sup>4</sup> Tsinghua-Peking Center for Life Sciences, School of Medicine, Tsinghua University,  
16 Beijing, China.

17 <sup>5</sup> Beijing Sungen Biomedical Technology Co., Ltd., Beijing, China.

18 <sup>6</sup> Department of Clinical Laboratory, the Third Medical Center, Chinese PLA General  
19 Hospital, Beijing, China.

20 <sup>7</sup> Department of Endocrinology, the Fifth Medical Centre, Chinese PLA General  
21 Hospital, Beijing, China.

22 <sup>8</sup> These authors contributed equally to this work: Yumeng Peng, Qiang Zeng, Luming  
23 Wan, Enhao Ma, Huilong Li, Xiaopan Yang.

24 \*These authors jointly supervised the work: Yi Fang, Qi Gao, Xiaoli Yang, Feixiang Wu,  
25 Hui Zhong, Congwen Wei.

26

# Supplementary Figures

## Supplementary Fig.1

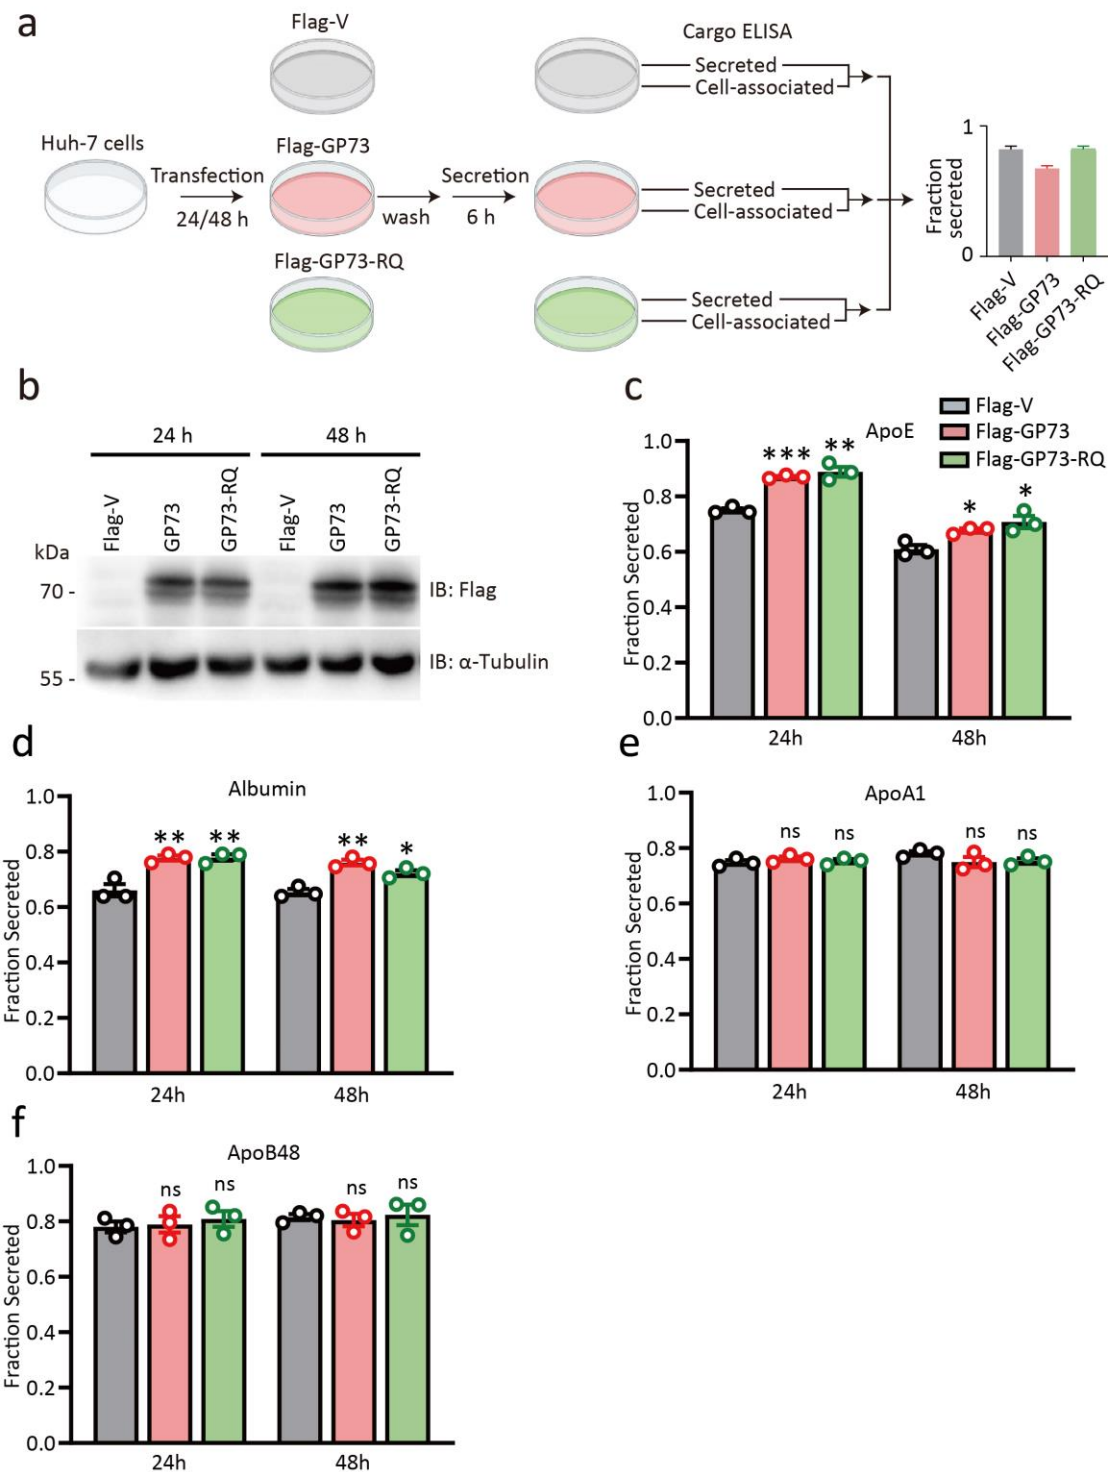

27

28 **Supplementary Fig. 1 GP73 reduces ApoB secretion in a GAP activity-dependent**

29 **manner (related to Fig. 1). a** Screening outline. Huh-7 cells transfected with

30 Flag-vector (Flag-V), Flag-GP73, or Flag-GP73-RQ mutant were washed 24 or 48 h

31 after transfection and allowed to secrete cargo in fresh medium for 6 h. The  
32 amounts of cargo that were secreted into the medium or that remained  
33 cell-associated were detected by ELISA in both medium and cell lysates. The  
34 secretion efficiency fraction was calculated as the ratio between the amount of  
35 cargo that was secreted and the total amount of cargo (secreted plus cell-associated  
36 cargo). **b** GP73 protein expression in Huh-7 cells transfected with Flag-vector (Flag-V),  
37 Flag-GP73, or Flag-GP73-RQ.  $\alpha$ -Tubulin was used as the equal loading control. Data  
38 were repeated three times with similar results. **c-f** ApoE (**c**), albumin (**d**), ApoA1 (**e**),  
39 and ApoB48 (**f**) levels in both the medium and cell lysates from cells transfected with  
40 Flag-vector (Flag-V), Flag-GP73, or Flag-GP73-RQ mutant at the indicated time points  
41 after transfection. n = 3 independent biological experiments. Differences between  
42 two groups were evaluated using the unpaired Student's t-test. Data were presented  
43 as mean values  $\pm$  SEM. ns, no statistical significance; \*P < 0.05; \*\*P < 0.01; \*\*\*P <  
44 0.001.

## Supplementary Fig. 2

a

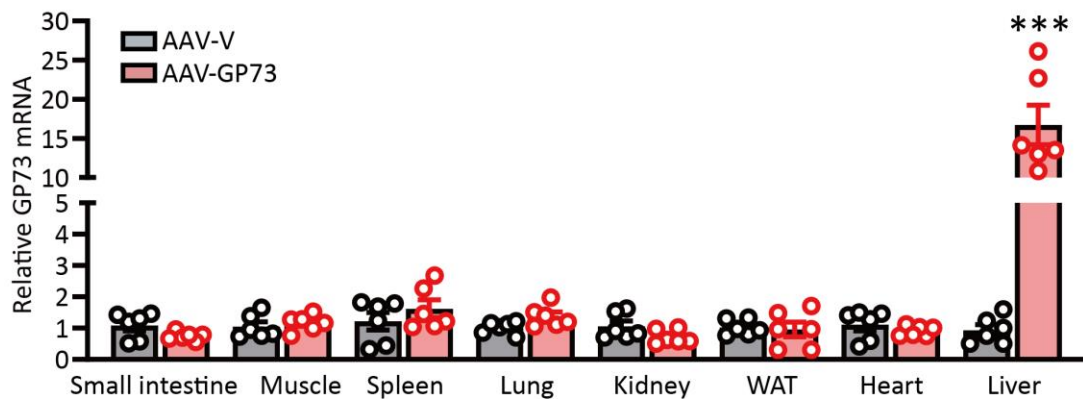

b

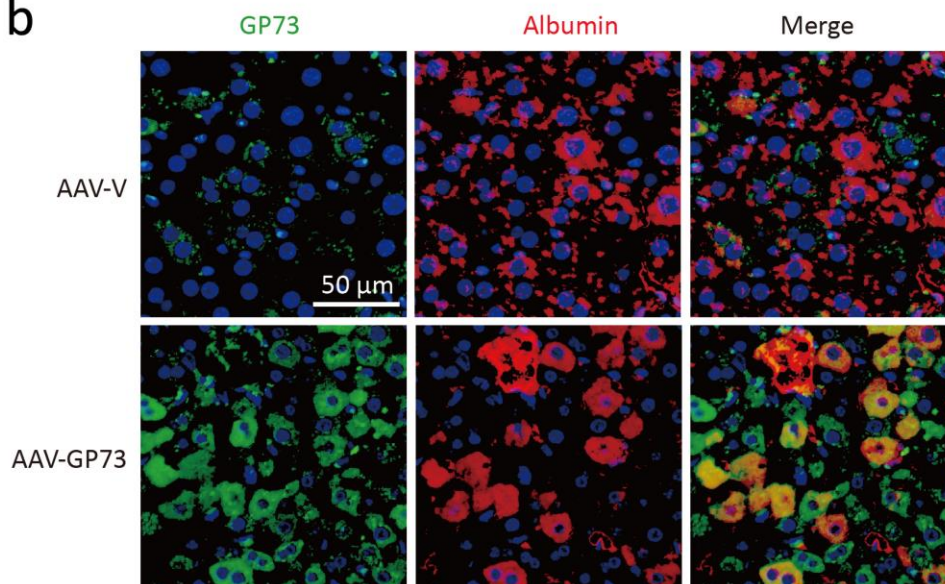

45

46 **Supplementary Fig. 2 AAV-GP73 induced GP73 expression is restricted to liver**

47 **tissues (related to Fig. 1). a** GP73 mRNA expression in multiple tissues from AAV-V-

48 or AAV-GP73-injected mice fed a regular diet for 6 months (n = 6 per group).

49 Differences between two groups were evaluated using the unpaired Student's t-test.

50 Data were presented as mean values ± SEM. \*\*\*P < 0.001.

51 **b** GP73 and albumin staining of livers from AAV-V- or AAV-GP73-injected mice fed a

52 regular diet for 6 months (n = 6 per group).

### Supplementary Fig. 3

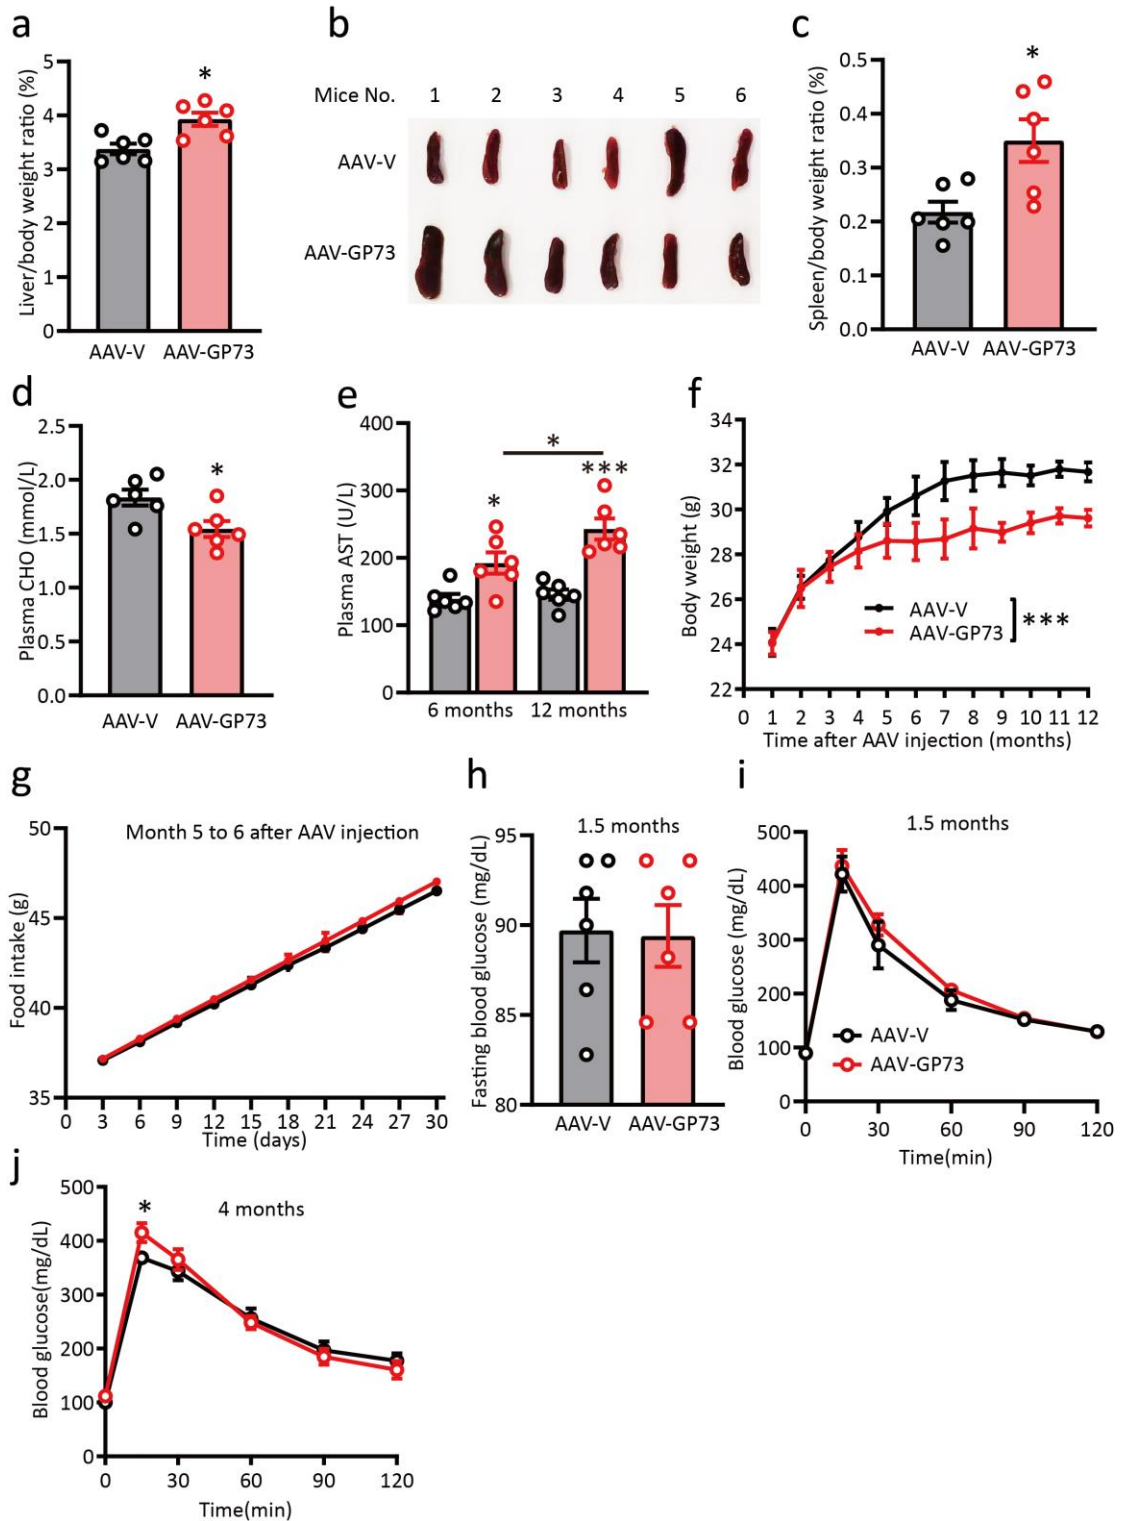

53

54 **Supplementary Fig. 3 Chronic elevations in hepatocyte GP73 trigger non-obese**

55 **NAFLD (related to Fig. 2). a-c Liver-to-body weight ratio (a), spleens (b), and**

56 **spleen-to-body weight ratio (c; n = 6 per group) of the AAV-V- or AAV-GP73-injected**

57 mice fed a regular diet for 6 months. Differences between two groups were  
58 evaluated using the unpaired Student's t-test. Data were presented as mean values  $\pm$   
59 SEM. \*P < 0.05. **d,e** Plasma levels of CHO (**d**) and AST (**e**) in AAV-V- or  
60 AAV-GP73-injected mice fed a regular diet for 6 or 12 months (n = 6 per group).  
61 Differences between two groups were evaluated using the unpaired Student's t-test.  
62 Data were presented as mean values  $\pm$  SEM. \*P < 0.05; \*\*\*P < 0.001. **f,g** Body weight  
63 (**f**) and food intake (**g**) of AAV-V- or AAV-GP73-injected mice fed a regular diet at the  
64 indicated times (n=6). Data of food intake were presented as the amount of  
65 cumulative food eaten by 2 mice per cage. \*\*\*P = 0.0002 by two-way ANOVA. Data  
66 were presented as mean values  $\pm$  SEM. **h** Glucose levels in blood samples from  
67 6-h-fasted AAV-V- or AAV-GP73-injected mice at 1.5 months after injection (n = 6 per  
68 group). Differences between two groups were evaluated using the unpaired  
69 Student's t-test. Data were presented as mean values  $\pm$  SEM. **i,j** Glucose tolerance  
70 test (GTT) for AAV-V- or AAV-GP73-injected mice at 1.5 months (**i**) and 4 months (**j**)  
71 after injection (n = 6 per group). Differences between two groups were evaluated  
72 using two-way ANOVA and Bonferroni's post hoc analysis. Data were presented as  
73 mean values  $\pm$  SEM. \*P < 0.05.

## Supplementary Fig. 4

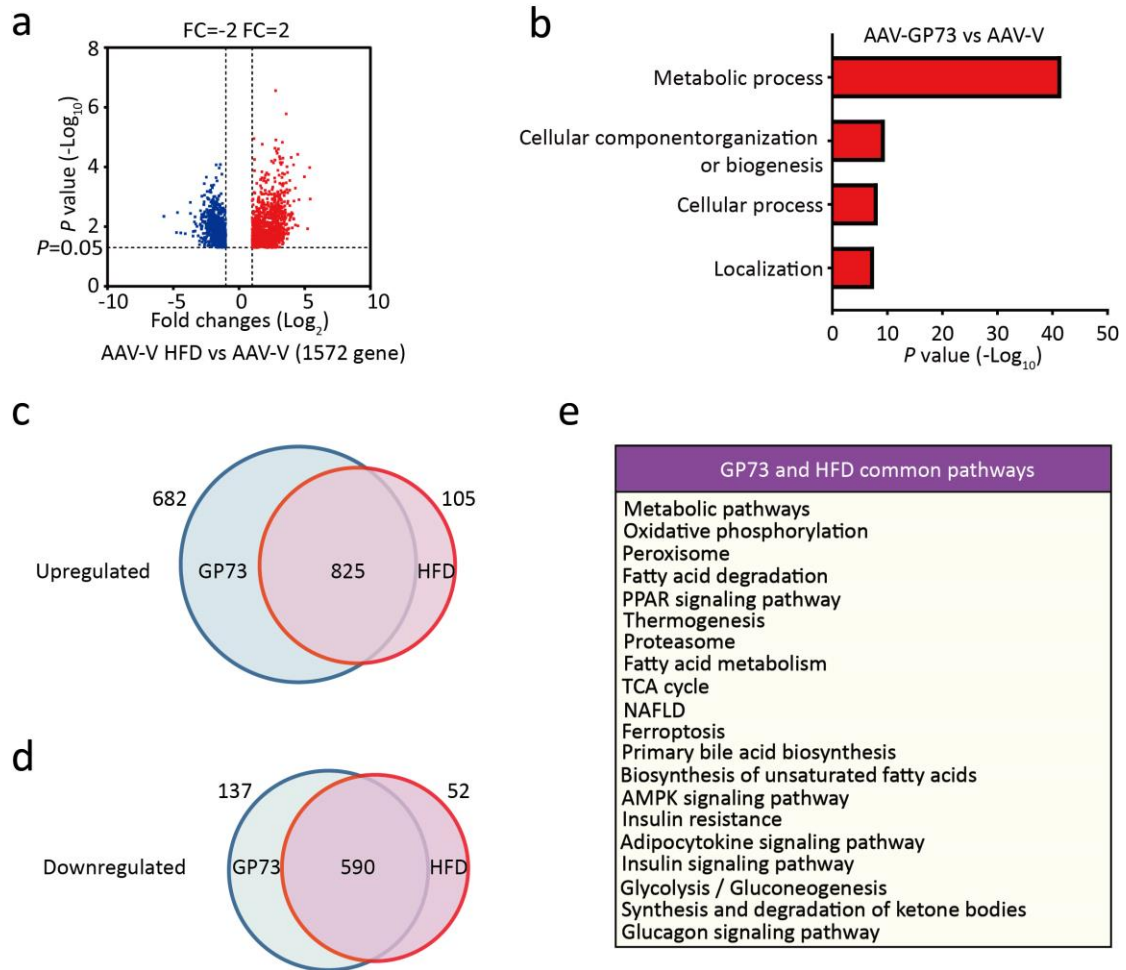

74

75 **Supplementary Fig. 4 Gene expression signatures in non-obese NAFLD induced by**

76 **GP73 (related to Fig. 4).** **a** Volcano plot of the DEGs in the livers from AAV-V-injected

77 mice fed a HFD for 12 months (n = 3 per group). Significantly downregulated genes

78 are in blue, and significantly upregulated genes are in red. The data were analyzed

79 with two-sided Student's t-test. The black vertical lines highlight fold changes (FCs)

80 of -2 and 2, while the black horizontal line represents a P value of 0.05. **b** Pathways

81 enriched for the DEGs in the livers from AAV-GP73-injected mice at 12 months after

82 injection according to GO term analysis at GO level 2 (n = 3 per group). The bar plot

83 shows significantly dysregulated pathways, and Fisher's exact test P values shown on

84 the x-axis. **c-d** Map of the upregulated genes (**c**) and downregulated genes (**d**) in the

85 livers from AAV-GP73 mice versus HFD mice. **e** Pathways commonly enriched in both  
 86 the AAV-GP73 and HFD groups according to KEGG pathway analyses.

## Supplementary Fig. 5

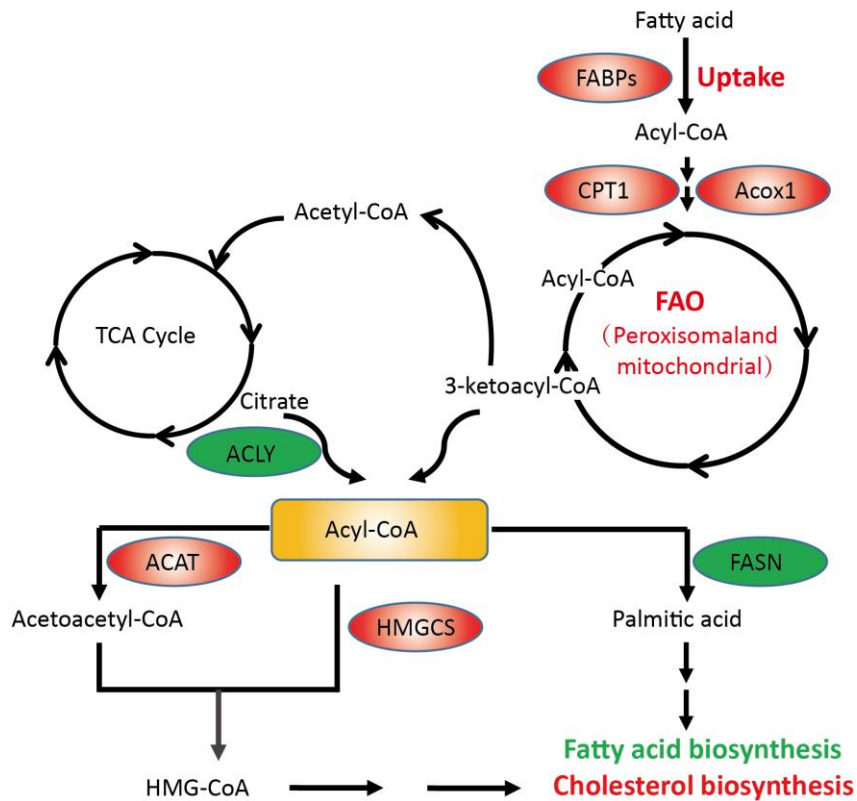

87

88 **Supplementary Fig. 5 Gene expression signatures in non-obese NAFLD induced by**

89 **GP73 (related to Fig.4).** DEGs of the critical enzymes in the livers from

90 AAV-GP73-injected mice versus AAV-V-injected mice fed a regular diet for 12 months.

91 Upregulated genes and pathways are highlighted in red, and downregulated genes

92 and pathways are highlighted in green.



## Supplementary Fig. 6

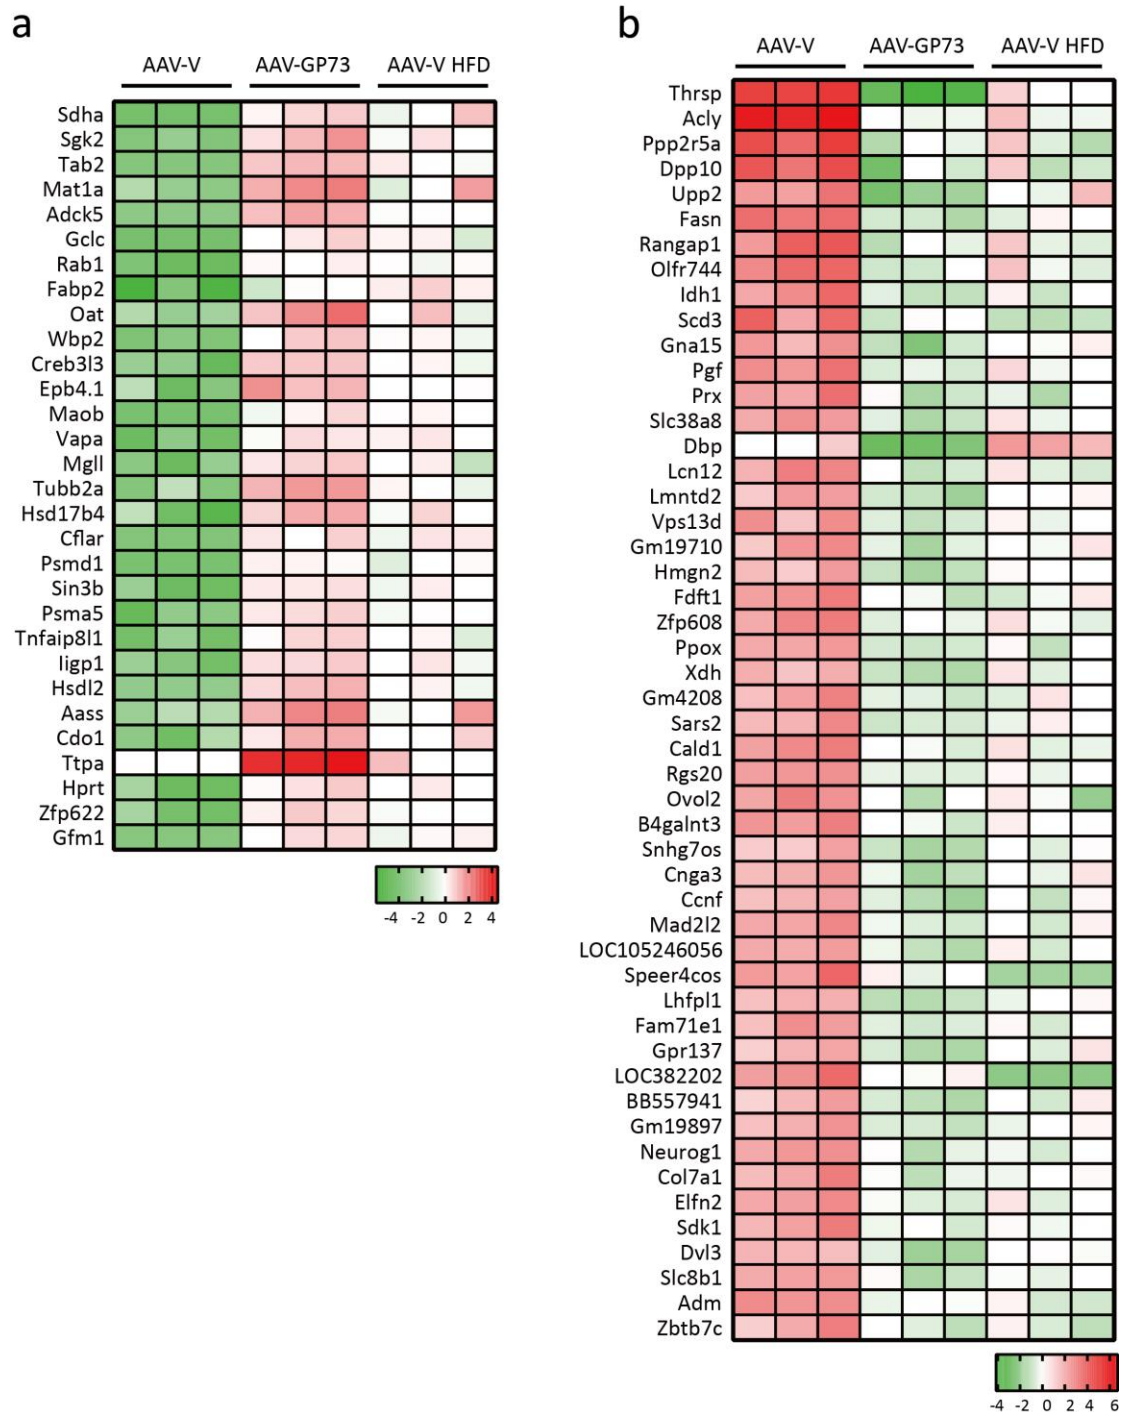

93

94 **Supplementary Fig. 6 Gene expression signatures were similar in non-obese NAFLD**

95 **induced by GP73 and obese NAFLD induced by HFD (related to Fig. 4). a,b Heatmap**

96 **of the top 21-50 highly upregulated genes (a) and the top 50 highly downregulated**

97 **genes (b) in the livers from the AAV-GP73 and HFD groups.**

## Supplementary Fig. 7

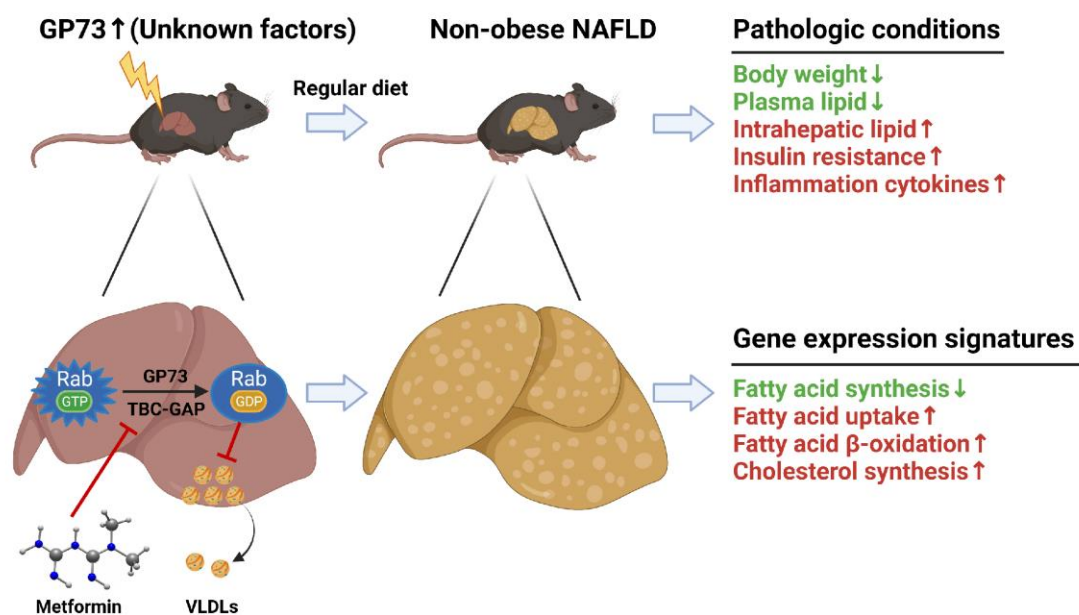

98

99 **Supplementary Fig. 7 Hypothetical model of the involvement of GP73 in triggering**

100 **non-obese NAFLD.** In the context of the consumption of a regular diet, the

101 prolonged increase in hepatocyte GP73 induced by unknown factors will lead to the

102 onset of non-obese NAFLD, including reduced body weight, decreased serum lipid

103 levels, massive intrahepatic lipid accumulation, elevated baseline levels of

104 inflammatory cytokines, and gradual insulin resistance development. Transcriptional

105 changes in GP73-high livers displayed enhanced FAO activity, reduced FA synthesis,

106 upregulated FA uptake and increased cholesterol synthesis. The figure was created

107 and exported with BioRender.com under a paid subscription.

108 **Supplementary Table**

109 Supplementary Table 1. Characteristics of the study participants based on obesity  
 110 status.

| Characteristics           | Non-obese controls<br>(n=14) | NAFLD without<br>obesity<br>(n=14) | <i>P</i> value |
|---------------------------|------------------------------|------------------------------------|----------------|
| Age (years)               | 39.2±13.6                    | 40.1±10.4                          | 0.8456         |
| Gender (male, %)          | 10 (71.4)                    | 9 (64.3)                           |                |
| BMI (kg/m <sup>2</sup> )  | 21.5±3.5                     | 23.5±1.4                           | 0.0578         |
| WC (cm)                   | 79.5±6.5                     | 81.3±8.4                           | 0.5376         |
| Glucose (mmol/L)          | 5.1±0.5                      | 5.4±1.7                            | 0.5320         |
| SBP (mmHg)                | 116.4±9.0                    | 121.5±54.2                         | 0.7311         |
| DBP (mmHg)                | 68.0±6.6                     | 69.6±13.8                          | 0.6987         |
| WBC (x10 <sup>9</sup> /L) | 5.3±1.0                      | 6.8±3.3                            | 0.1157         |
| Hb (g/L)                  | 127.9±15.8                   | 144.5±64.0                         | 0.3548         |
| PLT (x10 <sup>9</sup> /L) | 227.5±41.1                   | 259.6±130.1                        | 0.3868         |
| TG (mmol/L)               | 0.7±0.2                      | 1.9±1.6                            | 0.0099         |
| CHO (mmol/L)              | 4.9±0.7                      | 4.8±0.9                            | 0.7454         |
| LDL-C (mmol/L)            | 2.6±0.6                      | 2.6±0.7                            | >0.9999        |
| HDL-C (mmol/L)            | 1.7±0.3                      | 1.2±0.4                            | 0.0009         |
| ALT (U/L)                 | 16.7±7.3                     | 37.6±28.8                          | 0.0141         |
| AST (U/L)                 | 21.5±17.8                    | 24.2±9.8                           | 0.6232         |
| UA (μmol/L)               | 305.1±74.9                   | 426.9±85.3                         | 0.0004         |
| Adiponectin (μg/mL)       | 8.0±2.4                      | 5.0±1.3                            | 0.0004         |
| Leptin (ng/mL)            | 7.7±3.1                      | 8.5±2.9                            | 0.4870         |
| A/L (x10 <sup>3</sup> )   | 1.3±1.0                      | 0.7±0.3                            | 0.0302         |
| MRI-HFF (%)               | 3.0±2.4                      | 32.1±14.8                          | <0.0001        |

111

112 Abbreviations: NAFLD, nonalcoholic fatty liver disease; BMI, body mass index; WC,  
 113 waist circumference; SBP, systolic blood pressure; DBP, diastolic blood pressure;  
 114 WBC, white blood cell; Hb, hemoglobin; PLT, platelet; TG, triglyceride; CHO,  
 115 cholesterol; HDL, high-density lipoprotein; LDL, low-density lipoprotein; ALT, alanine  
 116 aminotransferase; AST, aspartate aminotransferase; UA, uric acid; A/L, adiponectin  
 117 to leptin ratio; MRI-HFF, magnetic resonance imaging hepatic fat fraction.

118 The data are expressed as the means ± SDs or numbers (percentages).

119 The statistical analyses (*P* value) were performed by comparing non-obese controls  
 120 vs. **NAFLD without obesity** by two-sided unpaired Student's t-tests.

121

122 **Supplementary Methods**

123 **Magnetic Resonance Imaging (MRI)**

124 The MRI examinations were performed with a 3.0T MRI imaging system (Trio Tim  
125 Siemens, Germany) with an 8-channel body coil. Dual in-phase, opposed-phase  
126 T1-based gradient echo image acquisition was performed in the axial plane during an  
127 end-expiratory breath-hold with an approximate acquisition time of 16 s. The  
128 two-point Dixon method based on phase-shift imaging was used in which hepatic fat  
129 fraction (HFF) was calculated by computing the relative signal intensity (SI) decrease  
130 in the liver on opposed-phase images compared with in-phase images after taking a  
131 mean of twelve  $>1 \text{ cm}^2$  regions of interest (ROIs) placed on multiple slices, taking  
132 care to avoid areas with vessels, motion artifacts, and partial volume effects. ROIs  
133 were placed at anatomically matched locations on paired images by using a  
134 coregistration tool available on the workstation to ensure assessment of similar liver  
135 parenchyma on in- and out-phase images. Because the tissue of interest is measured  
136 at a colocalized location at each TE, depth-dependent SI changes in the image do not  
137 confound the results<sup>1</sup>.

138 The dual-echoT1-weighted sequence parameters were as follows: repetition time of  
139 290 ms; echo time of 1.2 ms for OP images and 2.3 ms for IP images; flip angle, 70°;  
140 section thickness, 6 mm; matrix size, 288 × 188; FOV, 34 cm × 45 cm. HFF was  
141 calculated as the percentage of relative SI loss of the liver on opposed-phase images  
142 compared to in-phase images, with the following formula:  $\text{HFF} = [(S_{\text{lin}} - S_{\text{lout}})/2 \times$   
143  $S_{\text{lin}}] \times 100$ , where  $S_{\text{lin}}$  and  $S_{\text{lout}}$  are SI of IP and OP images, respectively. MR imaging

144 results were interpreted by an experienced radiologist who was blinded to the  
145 clinical, laboratory, and histological findings<sup>2</sup>. The diagnosis of NAFLD was based on  
146 magnetic resonance imaging (MRI) with HFF  $\geq$  5.5%. The control group with < 5.5%  
147 HFF, and the fatty liver group comprised patients with  $\geq$  5.5% HFF<sup>3</sup>.

#### 148 **GAP assay**

149 A GAP assay using an EnzChek Phosphate Assay Kit (Invitrogen, E12020) and kinetics  
150 determinations were performed in strict accordance with a previously described  
151 procedure<sup>4</sup>. Briefly, Rabs were loaded with GTP (Thermo Fisher Scientific, R0461) by  
152 incubating GP73 with a 50-fold molar of GTP at 25 °C for 1 h in 20 mM HEPES pH 7.5,  
153 150 mM NaCl, 5 mM EDTA, and 1 mM dithiothreitol. Free GTP was removed with a  
154 desalting column (Thermo Fisher Scientific, 89891) pre-equilibrated with 20 mM  
155 HEPES pH 7.5 and 150 mM NaCl. The single-turnover kinetics of intrinsic and  
156 GAP-accelerated GTP hydrolysis were measured by a continuous enzyme assay for  
157 the release of inorganic phosphate with the use of reagents from the EnzChek  
158 Phosphate Assay Kit (Invitrogen, E12020). GTP-loaded Rabs were mixed with  
159 solutions containing the assay reagents and GAPs. The final solutions contained 20  
160 mM HEPES pH 7.5, 150 mM NaCl, 0.15 mM 2-amino-6-mercapto-7-methylpurine  
161 ribonucleoside, 0.75 U/ml purine nucleoside phosphorylase, 10 mM MgCl<sub>2</sub>, 20 nM  
162 GP73 protein and various concentrations of GTP-loaded Rabs. The absorbance at 360  
163 nm was monitored with a microplate spectrometer (Tecan, M1000). The data were  
164 analyzed by fitting them simultaneously to the pseudo-first-order Michaelis-Menten  
165 model function:

$$A(t) = (A_{\infty} - A_0)(1 - e^{-kt}) + A_0$$

$$k_{\text{obs}} = k_{\text{intr}} + \frac{k_{\text{cat}}}{K_M} [GAP]$$

166 To calculate the catalytic efficiency ( $k_{\text{cat}}/K_M$ ), the observed kinetics ( $k_{\text{obs}}$ ) and the  
 167 intrinsic rate constant ( $k_{\text{intr}}$ ) were measured by fitting the data into a linear  
 168 regression model according to the transformation form of the pseudo-first-order  
 169 Michaelis-Menten model function. The calculation is shown below:

$$A(t) = (A_{\infty} - A_0)(1 - e^{-kt}) + A_0$$

$$A(t) = (A_{\infty} - A_0) - (A_{\infty} - A_0)e^{-kt} + A_0$$

$$A(t) = A_{\infty} - (A_{\infty} - A_0)e^{-kt}$$

$$A(t) - A_{\infty} = -(A_{\infty} - A_0)e^{-kt}$$

$$A_{\infty} - A(t) = (A_{\infty} - A_0)e^{-kt}$$

$$\ln[A_{\infty} - A(t)] = \ln[(A_{\infty} - A_0)e^{-kt}]$$

$$\ln[A_{\infty} - A(t)] = \ln(A_{\infty} - A_0) + \ln(e^{-kt})$$

$$\ln[A_{\infty} - A(t)] = \ln(A_{\infty} - A_0) - kt$$

170 From this equation,  $\ln[A_{\infty} - A(t)]$  was regarded as the response variable and was  
 171 regressed on the explanatory variable time  $t$ . The resulting regression coefficients  
 172 were the desired rate constants with negative signs in the front. The observed  
 173 kinetics ( $k_{\text{obs}}$ ) and the intrinsic rate constant ( $k_{\text{intr}}$ ) were then acquired by removing  
 174 the minus signs, and the values of  $k_{\text{obs}}$  and  $k_{\text{intr}}$  were plugged back into the equation  
 175 below to obtain the catalytic efficiency ( $k_{\text{cat}}/K_M$ ) with the concentration of  
 176 GTPase-activating protein (GAP) set to 20 nM:

$$k_{\text{obs}} = k_{\text{intr}} + \frac{k_{\text{cat}}}{K_M} [GAP]$$

177 The catalytic efficiency ( $k_{\text{cat}}/K_m$ ) and intrinsic rate constant for GTP hydrolysis ( $k_{\text{intr}}$ )  
178 were treated as global parameters.

### 179 **Microscale thermophoresis (MST) assay**

180 An MST assay was conducted as previously described<sup>5</sup>. GP73-His-tagged proteins  
181 were labeled with NT-647 dye for 30 min at room temperature, as recommended by  
182 the Monolith His-Tag Labeling Kit RED-tris-NTA protocol (NanoTemper Technologies,  
183 MO-L008). PBS was used as the binding buffer for reactions, and 16-step, twofold  
184 dilution curves for metformin at the concentrations indicated were created. Labeled  
185 protein in binding buffer was then added to diluted metformin or berberine at room  
186 temperature. The samples were loaded into standard glass capillaries (NanoTemper  
187 Technologies, MO-K022). MST was completed in three independent experiments on  
188 a Monolith NT.115 instrument (NanoTemper Technologies) running MO. Affinity  
189 Analysis software (v.2.1.23333) with settings of 80% excitation power and 40% MST  
190 power at room temperature.

191 The raw data were obtained from MO. Affinity Analysis software. The fluorescence  
192 intensity values were averaged, and the results are expressed as the relative changes  
193 from the values in the 0  $\mu\text{M}$  ligand condition. The data were fitted to saturation  
194 binding equations using GraphPad Prism 8.0. The dotted lines indicate areas where  
195 data could not be fitted.

### 196 **Histological analysis**

197 Formalin-fixed liver tissue was processed, and 5- $\mu\text{m}$ -thick paraffin sections were  
198 stained with hematoxylin and eosin (HE) and Oil Red O (ORO) solution for histological

199 analysis. The histological examination was performed using the histological scoring  
200 system for NAFLD by an experienced pathologist without prior knowledge of the  
201 treatments. The NAFLD activity score (NAS) was quantified by summing the scores of  
202 steatosis (0-3), lobular inflammation (0-3), and hepatocyte ballooning (0-2). NASH  
203 was defined for cases with NASs  $\geq 4$ .

#### 204 **Microarray analyses**

205 Total RNA was extracted and purified using a RNeasy microkit according to the  
206 manufacturer's instructions and checked for a RIN number to inspect RNA  
207 integration with an Agilent Bioanalyzer 2100 (Agilent Technologies). Total RNA was  
208 amplified, labeled and purified using Agilent G3 Mouse GE v2 8×60K according to the  
209 manufacturer's instructions at Shanghai Biotechnology Corporation. Data were  
210 extracted with Feature Extraction software 10.7 (Agilent Technologies). Raw data  
211 were normalized by the quantile algorithm and limma packages in R. The data were  
212 analyzed by a bioinformatics analysis service at SHBIO (Shanghai, China). The criteria  
213 for differential expression were a  $P < 0.05$  and a fold change  $> \pm 2$  relative to the  
214 control expression. The DEGs were subjected to GO and KEGG pathway analyses by  
215 SHBIO (Shanghai, China) to investigate the potential functions of the DEGs. Pathways  
216 with  $P < 0.05$  were considered significantly enriched.

#### 217 **References**

- 218 1 Borra, R. J. *et al.* Nonalcoholic fatty liver disease: rapid evaluation of liver fat content with  
219 in-phase and out-of-phase MR imaging. *Radiology* **250**, 130-136,  
220 doi:10.1148/radiol.2501071934 (2009).
- 221 2 Fishbein, M. H., Gardner, K. G., Potter, C. J., Schmalbrock, P. & Smith, M. A. Introduction of  
222 fast MR imaging in the assessment of hepatic steatosis. *Magn Reson Imaging* **15**, 287-293,  
223 doi:10.1016/s0730-725x(96)00224-x (1997).



- 224 3 Cioffi, C. E. *et al.* Hepatic fat is a stronger correlate of key clinical and molecular abnormalities  
225 than visceral and abdominal subcutaneous fat in youth. *BMJ Open Diabetes Res Care* **8**,  
226 doi:10.1136/bmjdr-2019-001126 (2020).
- 227 4 Pan, X., Eathiraj, S., Munson, M. & Lambright, D. G. TBC-domain GAPs for Rab GTPases  
228 accelerate GTP hydrolysis by a dual-finger mechanism. *Nature* **442**, 303-306,  
229 doi:10.1038/nature04847 (2006).
- 230 5 Jerabek-Willemsen, M., Wienken, C. J., Braun, D., Baaske, P. & Duhr, S. Molecular interaction  
231 studies using microscale thermophoresis. *Assay Drug Dev Technol* **9**, 342-353,  
232 doi:10.1089/adt.2011.0380 (2011).
- 233 6 Feng, K. *et al.* Hepatic Lipidomics Analysis Reveals the Antiobesity and Cholesterol-Lowering  
234 Effects of Tangeretin in High-Fat Diet-Fed Rats. *J Agric Food Chem* **68**, 6142-6153,  
235 doi:10.1021/acs.jafc.0c01778 (2020).
- 236 7 Qin, M. *et al.* Insights into the prognosis of lipidomic dysregulation for death risk in patients  
237 with coronary artery disease. *Clin Transl Med* **10**, e189, doi:10.1002/ctm2.189 (2020).
- 238 8 Yuan, X. *et al.* Lipidomics profiling of goose granulosa cell model of stearoyl-CoA desaturase  
239 function identifies a pattern of lipid droplets associated with follicle development. *Cell Biosci*  
240 **11**, 95, doi:10.1186/s13578-021-00604-6 (2021).
- 241 9 Matyash, V., Liebisch, G., Kurzchalia, T. V., Shevchenko, A. & Schwudke, D. Lipid extraction by  
242 methyl-tert-butyl ether for high-throughput lipidomics. *J Lipid Res* **49**, 1137-1146,  
243 doi:10.1194/jlr.D700041-JLR200 (2008).

244
